# Supplementary material for: Unprecedented coordination modes for PDC (pyridine-2,5-dicarboxylate) in polymorphic 3D heterobimetallic compounds α- and β-[MNa2(PDC)2(H2O)4], with M = Ni, Co
Source: Royal Society of Chemistry journal article supplement (doi:10.1039/b920624h), 2010-01-01

Table S1.- Selected bond length (Å) and angles (°) for compound **1**

|                                  |            |                                               |            |
|----------------------------------|------------|-----------------------------------------------|------------|
| N(1)-Ni(1)                       | 2.061(4)   | O(8)-Na(1)                                    | 2.418(4)   |
| N(2)-Ni(1)                       | 2.043(4)   | O(8)-Na(2)                                    | 2.443(4)   |
| Ni(1)-O(7)                       | 2.019(4)   | O(9)-Na(1)                                    | 2.411(4)   |
| Ni(1)-O(3)                       | 2.025(3)   | O(10)-Na(1)                                   | 2.504(4)   |
| Ni(1)-O(9)                       | 2.153(3)   | O(11)-Na(2)                                   | 2.393(4)   |
| Ni(1)-O(5) <sup>i</sup>          | 2.233(3)   | O(12)-Na(2)                                   | 2.295(4)   |
| O(3)-Na(1)                       | 2.591(4)   | Na(2)-O(11) <sup>iii</sup>                    | 2.505(4)   |
| O(3)-Na(2)                       | 2.648(4)   | Na(1)-O(10) <sup>ii</sup>                     | 2.365(4)   |
| O(4)-Na(2)                       | 2.364(4)   | Na(1)-O(7) <sup>iv</sup>                      | 2.473(4)   |
|                                  |            |                                               |            |
| O(7)-Ni(1)-O(3)                  | 179.02(12) | O(4)-Na(2)-O(11)                              | 155.09(16) |
| O(3)-Ni(1)-N(2)                  | 98.51(15)  | O(12)-Na(2)-O(11)                             | 88.25(14)  |
| O(7)-Ni(1)-N(2)                  | 81.48(13)  | O(12)-Na(2)-O(4)                              | 115.58(16) |
| N(2)-Ni(1)-N(1)                  | 178.13(13) | O(4)-Na(2)-O(8)                               | 89.75(12)  |
| O(7)-Ni(1)-N(1)                  | 99.06(15)  | O(11)-Na(2)-O(8)                              | 93.15(13)  |
| O(3)-Ni(1)-N(1)                  | 80.91(13)  | O(12)-Na(2)-O(8)                              | 100.22(15) |
| N(1)-Ni(1)-O(9)                  | 92.11(13)  | O(12)-Na(2)-O(3)                              | 167.38(15) |
| O(7)-Ni(1)-O(9)                  | 91.98(12)  | O(11)-Na(2)-O(3)                              | 104.28(13) |
| N(2)-Ni(1)-O(9)                  | 89.65(12)  | O(11) <sup>iii</sup> -Na(2)-O(3)              | 91.08(12)  |
| O(3)-Ni(1)-O(9)                  | 88.99(12)  | O(8)-Na(2)-O(3)                               | 77.96(11)  |
| O(9)-Ni(1)-O(5) <sup>i</sup>     | 176.37(14) | O(4)-Na(2)-O(3)                               | 52.24(12)  |
| N(1)-Ni(1)-O(5) <sup>i</sup>     | 91.48(13)  | O(10)-Na(1)-O(3)                              | 175.06(14) |
| O(3)-Ni(1)-O(5) <sup>i</sup>     | 91.09(12)  | O(10) <sup>ii</sup> -Na(1)-O(3)               | 97.01(13)  |
| O(7)-Ni(1)-O(5) <sup>i</sup>     | 87.93(12)  | O(9)-Na(1)-O(3)                               | 71.61(11)  |
| N(2)-Ni(1)-O(5) <sup>i</sup>     | 86.75(12)  | O(8)-Na(1)-O(3)                               | 79.55(11)  |
| Ni(1)-O(7)-Na(1) <sup>i</sup>    | 155.24(17) | O(7) <sup>iv</sup> -Na(1)-O(3)                | 96.31(11)  |
| Ni(1)-O(9)-Na(1)                 | 100.42(12) | O(9)-Na(1)-O(8)                               | 145.05(12) |
| Ni(1)-O(3)-Na(1)                 | 98.29(13)  | O(10) <sup>ii</sup> -Na(1)-O(8)               | 112.46(15) |
| Ni(1)-O(3)-Na(2)                 | 153.54(15) | O(10) <sup>ii</sup> -Na(1)-O(9)               | 90.66(13)  |
| Na(1) <sup>ii</sup> -O(10)-Na(1) | 96.41(14)  | O(9)-Na(1)-O(10)                              | 113.31(13) |
| Na(2)-O(11)-Na(2) <sup>iii</sup> | 94.28(13)  | O(10) <sup>ii</sup> -Na(1)-O(10)              | 83.59(14)  |
| Na(1)-O(8)-Na(2)                 | 106.33(14) | O(8)-Na(1)-O(10)                              | 95.67(13)  |
| Na(1)-O(3)-Na(2)                 | 95.90(12)  | O(7) <sup>iv</sup> -Na(1)-O(10)               | 81.72(11)  |
| O(8)-Na(2)-O(11) <sup>iii</sup>  | 168.37(15) | O(9)-Na(1)-O(7) <sup>iv</sup>                 | 109.65(14) |
| O(12)-Na(2)-O(11) <sup>iii</sup> | 91.32(14)  | O(10) <sup>ii</sup> -Na(1)-O(7) <sup>iv</sup> | 158.43(16) |
| O(4)-Na(2)-O(11) <sup>iii</sup>  | 86.52(12)  | O(8)-Na(1)-O(7) <sup>iv</sup>                 | 53.81(12)  |
| O(11)-Na(2)-O(11) <sup>iii</sup> | 85.72(13)  |                                               |            |

Table S2.- Selected bond length (Å) and angles (°) for compound 3

|                                               |          |                                             |          |
|-----------------------------------------------|----------|---------------------------------------------|----------|
| N(1)-Ni(2)                                    | 2.036(3) | Na(3)-Ow(2) <sup>v</sup>                    | 2.449(4) |
| N(2)-Ni(2)                                    | 2.041(3) | Na(3)-O(3)                                  | 2.496(3) |
| N(3)-Ni(1)                                    | 2.045(3) | Na(3)-O(9) <sup>i</sup>                     | 2.567(3) |
| Na(1)-Ow(6)                                   | 2.310(4) | Ni(1)-O(9)                                  | 2.037(3) |
| Na(1)-O(6)                                    | 2.347(3) | Ni(1)-O(9) <sup>i</sup>                     | 2.037(3) |
| Na(1)-Ow(1) <sup>ii</sup>                     | 2.409(3) | Ni(1)-N(3) <sup>i</sup>                     | 2.045(3) |
| Na(1)-Ow(5)                                   | 2.430(4) | Ni(1)-Ow(3)                                 | 2.168(3) |
| Na(1)-O(5) <sup>ii</sup>                      | 2.509(3) | Ni(1)-Ow(3) <sup>i</sup>                    | 2.168(3) |
| Na(1)-O(5)                                    | 2.559(3) | Ni(2)-O(3)                                  | 2.024(3) |
| Na(2)-Ow(4)                                   | 2.334(3) | Ni(2)-O(5)                                  | 2.037(3) |
| Na(2)-Ow(5)                                   | 2.374(4) | Ni(2)-Ow(1)                                 | 2.129(3) |
| Na(2)-O(10)                                   | 2.396(3) | Ni(2)-O(11)                                 | 2.216(3) |
| Na(2)-O(4) <sup>iv</sup>                      | 2.420(3) | O(4)-Na(2) <sup>iv</sup>                    | 2.420(3) |
| Na(2)-Ow(6)                                   | 2.439(4) | O(5)-Na(1) <sup>ii</sup>                    | 2.509(3) |
| Na(2)-O(9) <sup>vi</sup>                      | 2.534(3) | O(9)-Na(2) <sup>iii</sup>                   | 2.534(3) |
| Na(3)-Ow(2)                                   | 2.361(3) | O(9)-Na(3) <sup>i</sup>                     | 2.567(3) |
| Na(3)-O(4)                                    | 2.406(3) | Ow(1)-Na(1) <sup>ii</sup>                   | 2.409(3) |
| Na(3)-Ow(3)                                   | 2.424(3) | Ow(2)-Na(3) <sup>v</sup>                    | 2.449(4) |
|                                               |          |                                             |          |
| Ow(6)-Na(1)-O(6)                              | 160.6(1) | O(3)-Na(3)-O(9) <sup>i</sup>                | 95.8(1)  |
| Ow(6)-Na(1)-Ow(1) <sup>ii</sup>               | 90.9(1)  | O(9)-Ni(1)-O(9) <sup>i</sup>                | 180.0(1) |
| O(6)-Na(1)-Ow(1) <sup>ii</sup>                | 108.5(1) | O(9)-Ni(1)-N(3) <sup>i</sup>                | 98.1(1)  |
| Ow(6)-Na(1)-Ow(5)                             | 85.9(1)  | O(9) <sup>i</sup> -Ni(1)-N(3) <sup>i</sup>  | 81.6(1)  |
| O(6)-Na(1)-Ow(5)                              | 86.1(1)  | O(9)-Ni(1)-N(3)                             | 81.6(1)  |
| Ow(1) <sup>ii</sup> -Na(1)-Ow(5)              | 110.8(1) | O(9) <sup>i</sup> -Ni(1)-N(3)               | 98.4(1)  |
| Ow(6)-Na(1)-O(5) <sup>ii</sup>                | 97.2(1)  | N(3) <sup>i</sup> -Ni(1)-N(3)               | 180.0(2) |
| O(6)-Na(1)-O(5) <sup>ii</sup>                 | 89.9(1)  | O(9)-Ni(1)-Ow(3)                            | 93.4(1)  |
| Ow(1) <sup>ii</sup> -Na(1)-O(5) <sup>ii</sup> | 73.0(1)  | O(9) <sup>i</sup> -Ni(1)-Ow(3)              | 86.6(1)  |
| Ow(5)-Na(1)-O(5) <sup>ii</sup>                | 175.1(1) | N(3) <sup>i</sup> -Ni(1)-Ow(3)              | 91.4(1)  |
| Ow(6)-Na(1)-O(5)                              | 108.9(1) | N(3)-Ni(1)-Ow(3)                            | 88.9(1)  |
| O(6)-Na(1)-O(5)                               | 53.9(1)  | O(9)-Ni(1)-Ow(3) <sup>i</sup>               | 86.6(1)  |
| Ow(1) <sup>ii</sup> -Na(1)-O(5)               | 150.9(1) | O(9) <sup>i</sup> -Ni(1)-Ow(3) <sup>i</sup> | 93.4(1)  |
| Ow(5)-Na(1)-O(5)                              | 92.3(1)  | N(3) <sup>i</sup> -Ni(1)-Ow(3) <sup>i</sup> | 88.9(1)  |
| O(5) <sup>ii</sup> -Na(1)-O(5)                | 83.2(1)  | N(3)-Ni(1)-Ow(3) <sup>i</sup>               | 91.1(1)  |
| Ow(4)-Na(2)-Ow(5)                             | 88.6(1)  | Ow(3)-Ni(1)-Ow(3) <sup>i</sup>              | 180.0    |
| Ow(4)-Na(2)-O(10)                             | 162.5(1) | O(3)-Ni(2)-O(5)                             | 179.0(1) |
| Ow(5)-Na(2)-O(10)                             | 108.8(1) | O(3)-Ni(2)-N(1)                             | 81.8(1)  |
| Ow(4)-Na(2)-O(4) <sup>iv</sup>                | 88.4(1)  | O(5)-Ni(2)-N(1)                             | 99.1(1)  |
| Ow(5)-Na(2)-O(4) <sup>iv</sup>                | 109.7(1) | O(3)-Ni(2)-N(2)                             | 97.8(1)  |
| O(10)-Na(2)-O(4) <sup>iv</sup>                | 87.8(1)  | O(5)-Ni(2)-N(2)                             | 81.3(1)  |
| Ow(4)-Na(2)-Ow(6)                             | 88.9(1)  | N(1)-Ni(2)-N(2)                             | 178.2(2) |
| Ow(5)-Na(2)-Ow(6)                             | 84.3(1)  | O(3)-Ni(2)-Ow(1)                            | 91.2(1)  |
| O(10)-Na(2)-Ow(6)                             | 90.5(1)  | O(5)-Ni(2)-Ow(1)                            | 89.3(1)  |
| O(4) <sup>iv</sup> -Na(2)-Ow(6)               | 165.6(1) | N(1)-Ni(2)-Ow(1)                            | 89.5(1)  |
| Ow(4)-Na(2)-O(9) <sup>vi</sup>                | 108.8(1) | N(2)-Ni(2)-Ow(1)                            | 92.2(1)  |
| Ow(5)-Na(2)-O(9) <sup>vi</sup>                | 160.2(1) | O(3)-Ni(2)-O(11)                            | 88.9(1)  |
| O(10)-Na(2)-O(9) <sup>vi</sup>                | 53.7(1)  | O(5)-Ni(2)-O(11)                            | 90.7(1)  |
| O(4) <sup>iv</sup> -Na(2)-O(9) <sup>vi</sup>  | 81.0(1)  | N(1)-Ni(2)-O(11)                            | 87.4(1)  |
| Ow(6)-Na(2)-O(9) <sup>vi</sup>                | 86.5(1)  | N(2)-Ni(2)-O(11)                            | 90.9(1)  |
| Ow(2)-Na(3)-O(4)                              | 110.3(1) | Ow(1)-Ni(2)-O(11)                           | 176.8(1) |
| Ow(2)-Na(3)-Ow(3)                             | 91.8(1)  | Ni(2)-O(3)-Na(3)                            | 155.9(2) |
| O(4)-Na(3)-Ow(3)                              | 145.9(1) | Na(3)-O(4)-Na(2) <sup>iv</sup>              | 102.9(1) |
| Ow(2)-Na(3)-Ow(2) <sup>v</sup>                | 82.6(1)  | Ni(2)-O(5)-Na(1) <sup>ii</sup>              | 98.2(1)  |
| O(4)-Na(3)-Ow(2) <sup>v</sup>                 | 94.3(1)  | Na(1) <sup>ii</sup> -O(5)-Na(1)             | 96.8(1)  |
| Ow(3)-Na(3)-Ow(2) <sup>v</sup>                | 114.7(1) | Ni(2)-O(5)-Na(1)                            | 152.7(1) |
| Ow(2)-Na(3)-O(3)                              | 157.0(1) | Ni(1)-O(9)-Na(2) <sup>iii</sup>             | 151.3(1) |
| O(4)-Na(3)-O(3)                               | 54.0(1)  | Ni(1)-O(9)-Na(3) <sup>i</sup>               | 100.5(1) |

|                                             |          |                                               |          |
|---------------------------------------------|----------|-----------------------------------------------|----------|
| Ow(3)-Na(3)-O(3)                            | 110.3(1) | Na(2) <sup>iii</sup> -O(9)-Na(3) <sup>i</sup> | 95.5(1)  |
| Ow(2) <sup>v</sup> -Na(3)-O(3)              | 82.2(1)  | Ni(2)-Ow(1)-Na(1) <sup>ii</sup>               | 98.8(1)  |
| Ow(2)-Na(3)-O(9) <sup>i</sup>               | 97.9(1)  | Na(3)-Ow(2)-Na(3) <sup>v</sup>                | 97.5(1)  |
| O(4)-Na(3)-O(9) <sup>i</sup>                | 80.6(1)  | Ni(1)-Ow(3)-Na(3)                             | 101.4(1) |
| Ow(3)-Na(3)-O(9) <sup>i</sup>               | 70.6(1)  | Na(2)-Ow(5)-Na(1)                             | 94.2(1)  |
| Ow(2) <sup>v</sup> -Na(3)-O(9) <sup>i</sup> | 174.7(1) | Na(1)-Ow(6)-Na(2)                             | 95.6(1)  |

Figure S1.- Pattern matching diagram corresponding to the mixture of phases 2 and 4

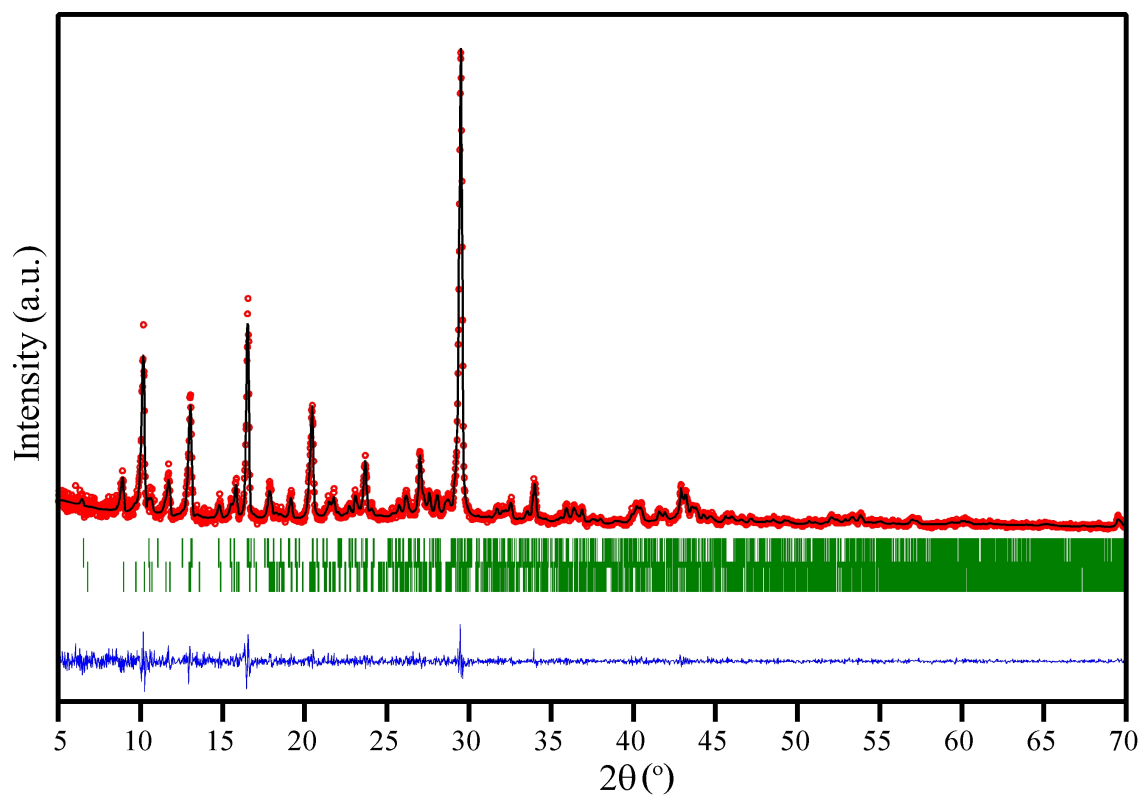

Supplement: b920624h.pdf [file b920624h.pdf]
